# Supplementary material
Source: PubMed Central journal article supplement (PMC4424394)

## Supplemental data

**Supplemental Figure 1: Venn diagrams of the identified oxidized proteins (A) and MetO peptides (B).** Following 1 h of high light exposure 365 MetO peptides were identified in 296 proteins, whereas after 3 h there were 354 MetO peptides in 294 proteins. There is a considerable overlap of 186 proteins that contain 206 identical MetO sites at the two time points sampled.

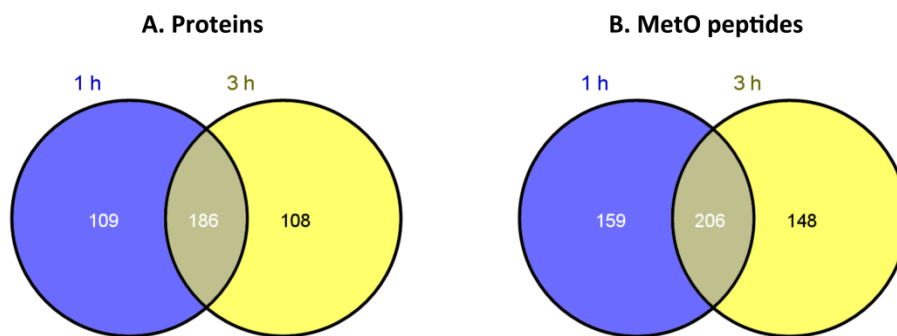

**Supplemental Figure 2: Kinetics of GSTF9 and GSTT23.** Enzyme activities of GSTF9 and GSTT23 were determined via the CDNB assay at a pH of 6.5. Both recombinant GSTs transfer GSH to CDNB with initial velocities ( $V_i$ ) linear to the concentration of added GST with a constant 1 mM final concentration of substrate **(A)**. Kinetic parameters were calculated from the Michaelis-Menten model by plotting  $V_i/[GST]$  in function of varying concentrations of CDNB **(B)**.

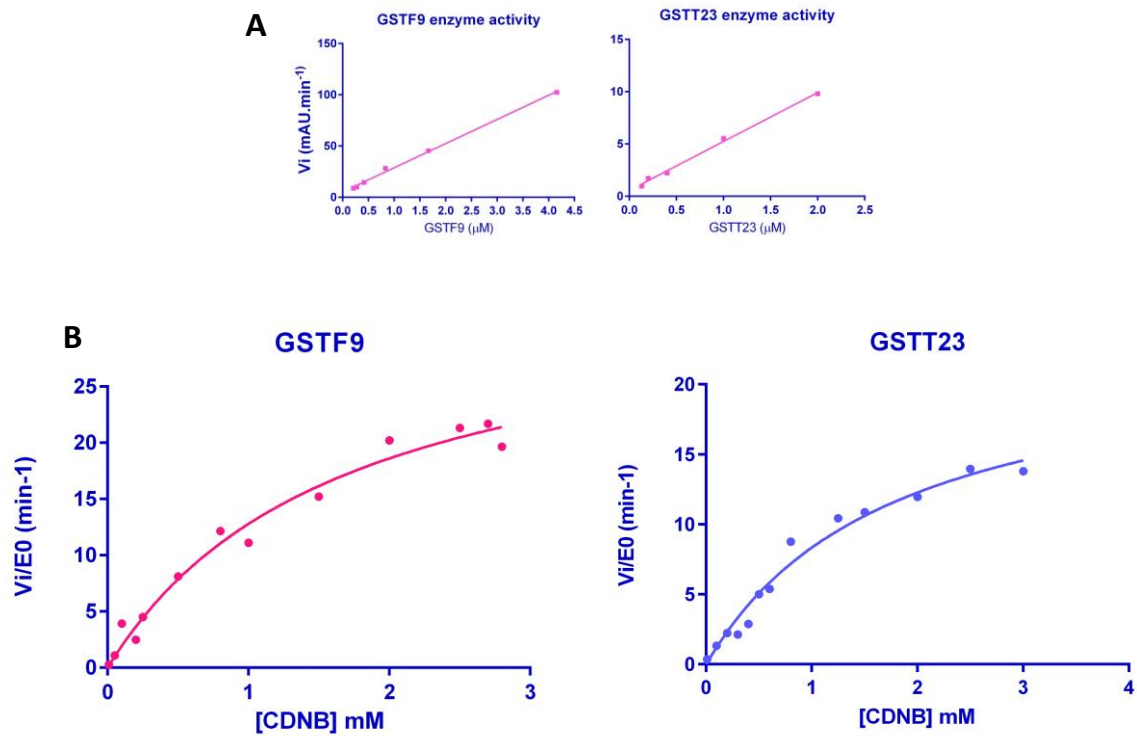

**Supplemental Figure 3: Optimization of *in vitro* GSTF9 oxidation.** LC-MS (Q-TOF) measurements of GSTF9 before and after addition of 0.03% H<sub>2</sub>O<sub>2</sub> and incubation for 135 min at 10°C. GSTF9 is present as a monomer due to the denaturing effect of acetonitrile and the low pH. Also, a population of GSTF9 without the initiator methionine was detected. Upon oxidation, a prominent peak of single oxidized GSTF9 appears.

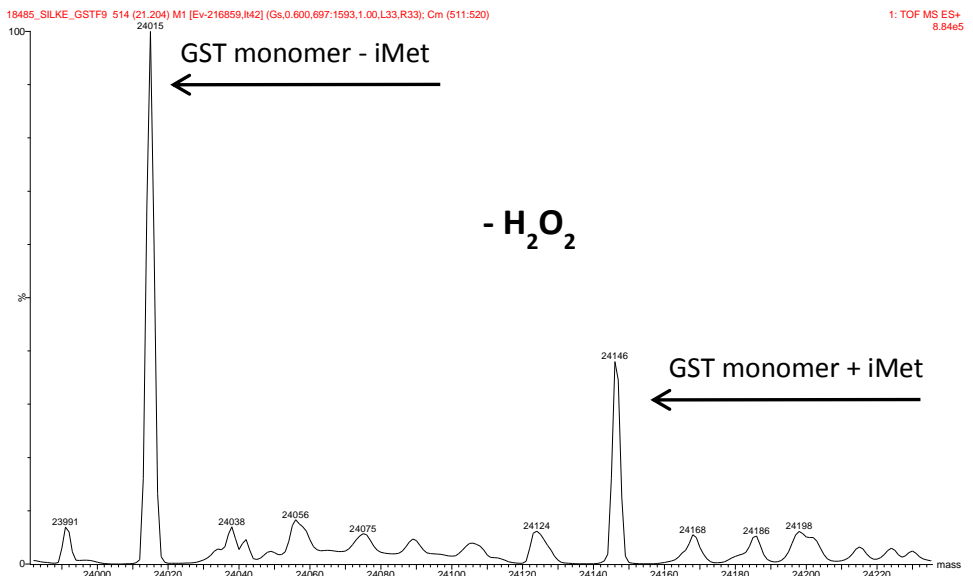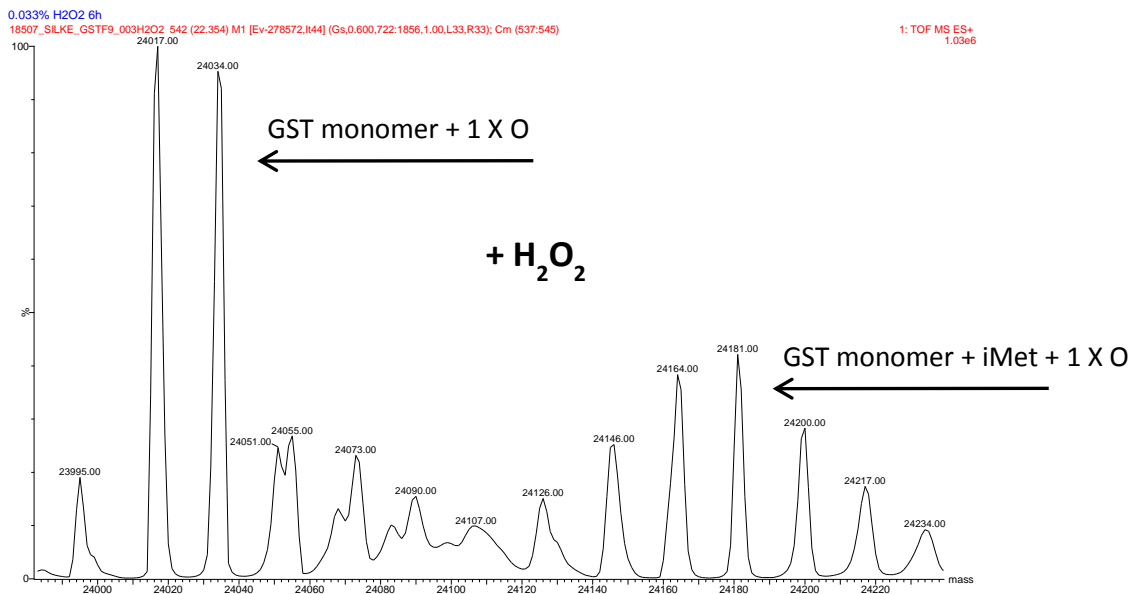

**Supplemental Figure 4: Oxidation of Met-35 in GSTF9.** LC-MS/MS analysis identified the G<sub>24</sub>VAFETIPVDLMK<sub>36</sub> peptide after *in vitro* oxidation of GSTF9. This peptide, previously identified to contain a target for *in vivo* methionine oxidation (Met-35), is present in two forms; with or without Met-35 oxidized. The extracted-ion chromatogram shows that, as expected, the oxidized peptide with a mass of 1434.743 Da elutes earlier than the non-oxidized peptides (mass of 1418.747 Da). The MS/MS spectra are also shown with b- and y-ions indicated and displayed as underlined residues or residues in red on the peptide sequence, respectively.

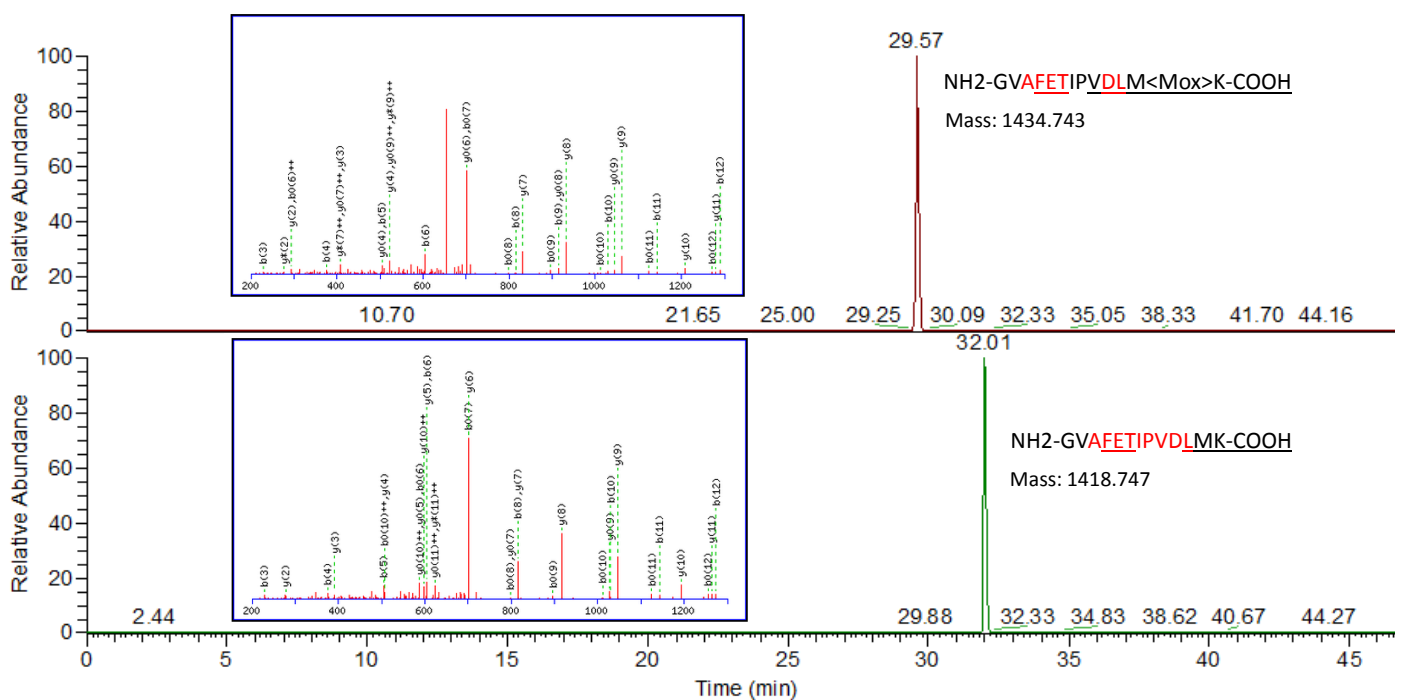

**Supplemental Figure 5: Multiple sequence alignment of the rubredoxin-like superfamily protein genes.** Sequence alignment of all homologous rubredoxin genes (43) across the plant kingdom (19 species) shows that the site of methionine oxidation (highlighted in yellow) lies within a conserved sequence patch. The 3 *Arabidopsis* genes are boxed with red dotted lines.

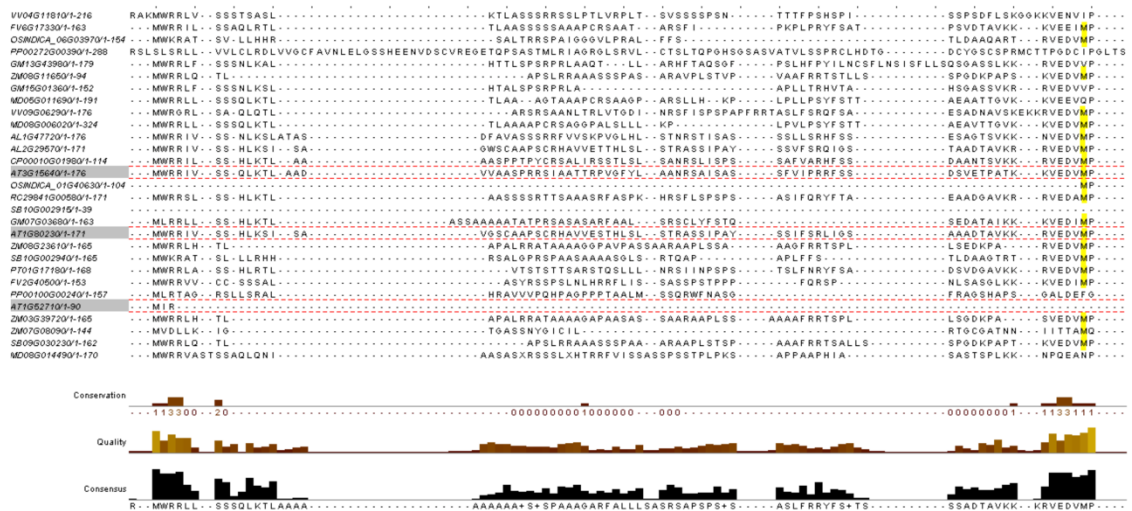

Supplement: supp_M114.043729_mcp.M114.043729-1.pdf [file supp_M114.043729_mcp.M114.043729-1.pdf]
